# Supplementary material
Source: PubMed Central journal article supplement (PMC3716407)
Supplement: supp_80.22.2065_Appendices_e-1-6.pdf [file supp_80.22.2065_Appendices_e-1-6.pdf]

## **Appendices e-1 through e-6**

### **Appendix e-1: 2011–2013 Guideline Development Subcommittee (GDS) Members**

John D. England, MD, FAAN (Chair); Cynthia Harden, MD (Vice-Chair); Melissa Armstrong, MD; Eric Ashman, MD; Misha-Miroslav Backonja, MD; Richard L. Barbano, MD, PhD, FAAN; Diane Donley, MD; Terry Fife, MD, FAAN; David Gloss, MD; John J. Halperin, MD, FAAN; Cheryl Jaigobin, MD; Andres M. Kanner, MD; Jason Lazarou, MD; Steven R. Messé, MD, FAAN; David Michelson, MD; Pushpa Narayanaswami, MD, MBBS; Anne Louise Oaklander, MD, PhD, FAAN; Tamara Pringsheim, MD; Alexander Rae-Grant, MD; Michael Shevell, MD, FAAN; Theresa A. Zesiewicz, MD, FAAN; Jonathan P. Hosey, MD, FAAN (Ex-Officio); Stephen Ashwal, MD, FAAN (Ex-Officio); Deborah Hirtz, MD, FAAN (Ex-Officio)

## **Appendix e-2: Mission Statement of GDS**

The mission of the GDS is to prioritize, develop, and publish evidence-based guidelines related to the diagnosis, treatment, and prognosis of neurological disorders.

The GDS is committed to using the most rigorous methods available within our budget, in collaboration with other available AAN resources, to most efficiently accomplish this mission.

### Appendix e-3: MEDLINE Complete Search Strategy

Database: Ovid MEDLINE(R) <1966 to August Week 1 2006>

Search Strategy:

- 
- 1 exp cerebrovascular accident/pc (4407)
  - 2 exp cerebrovascular disorders/pc (12238)
  - 3 limit 2 to yr="1966 - 1999" (6438)
  - 4 1 or 3 (10192)
  - 5 exp Platelet Aggregation Inhibitors/tu [Therapeutic Use] (22499)
  - 6 antiplatelet\$.mp. (7498)
  - 7 5 or 6 (27674)
  - 8 exp Aspirin/tu [Therapeutic Use] (11444)
  - 9 clopidogrel.mp. (2166)
  - 10 plavix.mp. (66)
  - 11 exp Ticlopidine/tu [Therapeutic Use] (1560)
  - 12 ticlid.mp. (45)
  - 13 exp Anti-Inflammatory Agents, Non-Steroidal/tu [Therapeutic Use] (40318)
  - 14 nsaid\$.mp. (10214)
  - 15 aggrenox.mp. (35)
  - 16 exp Dipyridamole/tu [Therapeutic Use] (1853)
  - 17 exp Pentoxifylline/tu [Therapeutic Use] (1367)
  - 18 cilostazol.mp. (453)
  - 19 5 or 6 or 7 or 8 or 9 or 10 or 11 or 12 or 13 or 14 or 15 or 16 or 17 or 18 (64137)
  - 20 (discontinuu\$ or cessat\$ or withdraw\$).mp. (149324)
  - 21 exp postoperative complications/ (295130)
  - 22 exp intraoperative complications/ (23636)
  - 23 exp risk/ or exp risk factors/ (458459)
  - 24 21 or 22 or 23 (746695)
  - 25 4 and 19 and 20 and 24 (21)
  - 26 19 and 20 and 24 (420)
  - 27 stroke.mp. or exp Cerebrovascular Accident/ (104552)
  - 28 exp Cerebral Infarction/ (18334)
  - 29 exp Cerebral Hemorrhage/ (19771)
  - 30 exp Subarachnoid Hemorrhage/ (11338)
  - 31 exp Ischemic Attack, Transient/ (14224)
  - 32 exp Myocardial Infarction/ (109330)
  - 33 exp Pulmonary Embolism/ (22473)
  - 34 exp Thrombosis/ (99862)
  - 35 exp Death/ (84293)
  - 36 27 or 28 or 29 or 30 or 31 or 32 or 33 or 34 (344041)
  - 37 26 and 36 (143)
  - 38 25 or 37 (143)
  - 39 limit 38 to humans (138)
  - 40 from 39 keep 1-138 (138)

Database: Ovid MEDLINE(R) <1966 to August Week 1 2006>

Search Strategy:

---

- 1 exp cerebrovascular accident/pc (4407)
- 2 exp cerebrovascular disorders/pc (12238)
- 3 limit 2 to yr="1966 - 1999" (6438)
- 4 1 or 3 (10192)
- 5 exp Platelet Aggregation Inhibitors/tu [Therapeutic Use] (22499)
- 6 antiplatelet\$.mp. (7498)
- 7 5 or 6 (27674)
- 8 exp Aspirin/tu [Therapeutic Use] (11444)
- 9 clopidogrel.mp. (2166)
- 10 plavix.mp. (66)
- 11 exp Ticlopidine/tu [Therapeutic Use] (1560)
- 12 ticlid.mp. (45)
- 13 exp Anti-Inflammatory Agents, Non-Steroidal/tu [Therapeutic Use] (40318)
- 14 nsaid\$.mp. (10214)
- 15 aggrenox.mp. (35)
- 16 exp Dipyridamole/tu [Therapeutic Use] (1853)
- 17 exp Pentoxifylline/tu [Therapeutic Use] (1367)
- 18 cilostazol.mp. (453)
- 19 5 or 6 or 7 or 8 or 9 or 10 or 11 or 12 or 13 or 14 or 15 or 16 or 17 or 18 (64137)
- 20 (discontinuu\$ or cessat\$ or withdraw\$).mp. (149324)
- 21 exp postoperative complications/ (295130)
- 22 exp intraoperative complications/ (23636)
- 23 exp risk/ or exp risk factors/ (458459)
- 24 21 or 22 or 23 (746695)
- 25 exp Hemorrhage/ (165579)
- 26 exp Blood Transfusion/ (59491)
- 27 exp Reoperation/ (44093)
- 28 25 or 26 or 27 (260422)
- 29 su.fs. (1085251)
- 30 exp surgery/ (22474)
- 31 procedur\$.mp. (592300)
- 32 29 or 30 or 31 (1509158)
- 33 19 and 32 and 24 and 28 (312)
- 34 4 and 19 and 24 and 28 (114)
- 35 exp cerebrovascular accident/ (37554)
- 36 stroke.mp. (87596)
- 37 exp cerebral infarction/ (18334)
- 38 exp cerebral hemorrhage/ (19771)
- 39 exp subarachnoid hemorrhage/ (11338)
- 40 exp ischemic attack, transient/ (14224)
- 41 exp myocardial infarction/ (109330)

- 42 exp pulmonary embolism/ (22473)
- 43 exp thrombosis/ (99862)
- 44 35 or 36 or 37 or 38 or 39 or 40 or 41 or 42 or 43 (344041)
- 45 33 and 44 (118)
- 46 34 or 45 (221)
- 47 limit 46 to humans (220)
- 48 from 47 keep 1-220 (220)
- 49 from 48 keep 1-220 (220)

Database: Ovid MEDLINE(R) <1966 to August Week 1 2006>

Search Strategy:

- 
- 1 exp cerebrovascular accident/pc (4407)
  - 2 exp cerebrovascular disorders/pc (12238)
  - 3 limit 2 to yr="1966 - 1999" (6438)
  - 4 1 or 3 (10192)
  - 5 exp Platelet Aggregation Inhibitors/tu [Therapeutic Use] (22499)
  - 6 antiplatelet\$.mp. (7498)
  - 7 5 or 6 (27674)
  - 8 exp Aspirin/tu [Therapeutic Use] (11444)
  - 9 clopidogrel.mp. (2166)
  - 10 plavix.mp. (66)
  - 11 exp Ticlopidine/tu [Therapeutic Use] (1560)
  - 12 ticlid.mp. (45)
  - 13 exp Anti-Inflammatory Agents, Non-Steroidal/tu [Therapeutic Use] (40318)
  - 14 nsaid\$.mp. (10214)
  - 15 aggrenox.mp. (35)
  - 16 exp Dipyridamole/tu [Therapeutic Use] (1853)
  - 17 exp Pentoxifylline/tu [Therapeutic Use] (1367)
  - 18 cilostazol.mp. (453)
  - 19 5 or 6 or 7 or 8 or 9 or 10 or 11 or 12 or 13 or 14 or 15 or 16 or 17 or 18 (64137)
  - 20 (discontinuu\$ or cessat\$ or withdraw\$).mp. (149324)
  - 21 exp postoperative complications/ (295130)
  - 22 exp intraoperative complications/ (23636)
  - 23 exp risk/ or exp risk factors/ (458459)
  - 24 21 or 22 or 23 (746695)
  - 25 exp Hemorrhage/ (165579)
  - 26 exp Blood Transfusion/ (59491)
  - 27 exp Reoperation/ (44093)
  - 28 25 or 26 or 27 (260422)
  - 29 su.fs. (1085251)
  - 30 exp surgery/ (22474)

31 procedur\$.mp. (592300)  
 32 29 or 30 or 31 (1509158)  
 33 19 and 32 and 24 and 28 (312)  
 34 4 and 19 and 24 and 28 (114)  
 35 exp cerebrovascular accident/ (37554)  
 36 stroke.mp. (87596)  
 37 exp cerebral infarction/ (18334)  
 38 exp cerebral hemorrhage/ (19771)  
 39 exp subarachnoid hemorrhage/ (11338)  
 40 exp ischemic attack, transient/ (14224)  
 41 exp myocardial infarction/ (109330)  
 42 exp pulmonary embolism/ (22473)  
 43 exp thrombosis/ (99862)  
 44 35 or 36 or 37 or 38 or 39 or 40 or 41 or 42 or 43 (344041)  
 45 33 and 44 (118)  
 46 34 or 45 (221)  
 47 limit 46 to humans (220)  
 48 from 47 keep 1-220 (220)  
 49 exp Time Factors/ (737757)  
 50 timing.mp. (41564)  
 51 49 or 50 (769607)  
 52 19 and 20 and 51 (283)  
 53 32 and 52 (35)  
 54 52 and 4 (3)  
 55 52 and 44 (52)  
 56 53 or 54 or 55 (72)  
 57 exp postoperative care/ (40796)  
 58 (21 or 57) and 52 (22)  
 59 56 or 58 (75)  
 60 limit 59 to humans (72)

Database: Ovid MEDLINE(R) <1966 to August Week 2 2006>

Search Strategy:

-----

1 exp cerebrovascular accident/pc (4424)  
 2 exp cerebrovascular disorders/pc (12262)  
 3 limit 2 to yr="1966 - 1999" (6438)  
 4 1 or 3 (10209)  
 5 exp Anticoagulants/tu [Therapeutic Use] (35426)  
 6 exp Warfarin/tu [Therapeutic Use] (4354)  
 7 5 or 6 (35426)  
 8 (discontinuu\$ or cessat\$ or withdraw\$.mp. (149522)  
 9 exp postoperative complications/ (295482)  
 10 exp intraoperative complications/ (23683)

- 11 exp risk/ or exp risk factors/ (459331)
- 12 9 or 10 or 11 (747886)
- 13 4 and 7 and 8 and 12 (17)
- 14 7 and 8 and 12 (220)
- 15 stroke.mp. or exp cerebrovascular accident/ (104750)
- 16 exp cerebral infarction/ (18354)
- 17 exp cerebral hemorrhage/ (19782)
- 18 exp subarachnoid hemorrhage/ (11348)
- 19 exp ischemic attack, transient/ (14233)
- 20 exp myocardial infarction/ (109392)
- 21 exp pulmonary embolism/ (22498)
- 22 exp thrombosis/ (99961)
- 23 exp death/ (84401)
- 24 15 or 16 or 17 or 18 or 19 or 20 or 21 or 22 (344418)
- 25 14 and 24 (172)
- 26 13 or 25 (172)
- 27 14 and 23 (4)
- 28 26 or 27 (174)
- 29 limit 28 to humans (172)
- 30 from 29 keep 1-172 (172)

Database: Ovid MEDLINE(R) <1966 to August Week 2 2006>  
 Search Strategy:

- 
- 1 exp cerebrovascular accident/pc (4424)
  - 2 exp cerebrovascular disorders/pc (12262)
  - 3 limit 2 to yr="1966 - 1999" (6438)
  - 4 1 or 3 (10209)
  - 5 exp anticoagulants/tu (35426)
  - 6 exp Warfarin/tu [Therapeutic Use] (4354)
  - 7 5 or 6 (35426)
  - 8 exp postoperative complications/ (295482)
  - 9 exp intraoperative complications/ (23683)
  - 10 exp risk/ or exp risk factors/ (459331)
  - 11 8 or 9 or 10 (747886)
  - 12 exp hemorrhage/ (165718)
  - 13 exp blood transfusion/ (59519)
  - 14 exp reoperation/ (44168)
  - 15 12 or 13 or 14 (260655)
  - 16 su.fs. (1086648)
  - 17 exp surgery/ (22501)
  - 18 procedur\$.mp. (593292)
  - 19 16 or 17 or 18 (1511128)
  - 20 7 and 11 and 15 and 19 (620)

21 4 and 7 and 11 and 15 (99)  
 22 exp cerebrovascular accident/ (37662)  
 23 stroke.mp. (87767)  
 24 exp cerebral infarction/ (18354)  
 25 exp cerebral hemorrhage/ (19782)  
 26 exp subarachnoid hemorrhage/ (11348)  
 27 exp ischemic attack, transient/ (14233)  
 28 exp myocardial infarction/ (109392)  
 29 exp pulmonary embolism/ (22498)  
 30 exp thrombosis/ (99961)  
 31 22 or 23 or 24 or 25 or 26 or 27 or 28 or 29 or 30 (344418)  
 32 20 and 31 (393)  
 33 21 or 32 (475)  
 34 limit 33 to humans (468)  
 35 4 and 34 (99)  
 36 stroke.ti. (26953)  
 37 34 and 36 (39)  
 38 35 or 37 (102)  
 39 from 38 keep 1-102 (102)

Database: Ovid MEDLINE(R) <1966 to August Week 2 2006>  
 Search Strategy:

---

1 exp cerebrovascular accident/pc (4424)  
 2 exp cerebrovascular disorders/pc (12262)  
 3 limit 2 to yr="1966 - 1999" (6438)  
 4 1 or 3 (10209)  
 5 exp anticoagulants/tu (35426)  
 6 exp Warfarin/tu [Therapeutic Use] (4354)  
 7 5 or 6 (35426)  
 8 (discontinuu\$ or cessat\$ or withdraw\$).mp. (149522)  
 9 su.fs. (1086648)  
 10 exp surgery/ (22501)  
 11 procedur\$.mp. (593292)  
 12 9 or 10 or 11 (1511128)  
 13 exp time factors/ (738553)  
 14 timing.mp. (41667)  
 15 13 or 14 (770481)  
 16 7 and 8 and 15 (112)  
 17 12 and 16 (25)  
 18 16 and 4 (2)  
 19 exp cerebrovascular accident/ (37662)  
 20 stroke.mp. (87767)  
 21 exp cerebral infarction/ (18354)



22 exp cerebral hemorrhage/ (19782)  
23 exp subarachnoid hemorrhage/ (11348)  
24 exp ischemic attack, transient/ (14233)  
25 exp myocardial infarction/ (109392)  
26 exp pulmonary embolism/ (22498)  
27 exp thrombosis/ (99961)  
28 19 or 20 or 21 or 22 or 23 or 24 or 25 or 26 or 27 (344418)  
29 16 and 28 (71)  
30 17 or 18 or 29 (83)  
31 exp postoperative care/ (40812)  
32 exp postoperative complications/ (295482)  
33 (31 or 32) and 16 (13)  
34 30 or 33 (84)  
35 limit 34 to human (81)  
36 from 35 keep 1-81 (81)

#### Appendix e-4: EMBASE Complete Search Strategy

Database Searched: **Embase** 2006 to 2011 Week 30

Date searched: August 02 2011

Search Topic: Anticoagulants and thrombosis risks

**Embase** 1980 to 2011 Week 30

| #  | Searches                        | Results | Search Type |
|----|---------------------------------|---------|-------------|
| 1  | perioperative period/           | 19922   | Advanced    |
| 2  | intraoperative period/          | 20125   | Advanced    |
| 3  | postoperative period/           | 99444   | Advanced    |
| 4  | preoperative period/            | 19354   | Advanced    |
| 5  | peroperative care/              | 8144    | Advanced    |
| 6  | postoperative care/             | 56278   | Advanced    |
| 7  | exp surgery/                    | 2604811 | Advanced    |
| 8  | procedure?.tw.                  | 758507  | Advanced    |
| 9  | (surgical or surger*).tw.       | 1183037 | Advanced    |
| 10 | peri-procedur*.tw.              | 622     | Advanced    |
| 11 | periprocedur*.tw.               | 2283    | Advanced    |
| 12 | operative*.tw.                  | 189247  | Advanced    |
| 13 | su.fs.                          | 1482951 | Advanced    |
| 14 | or/1-13                         | 3702821 | Advanced    |
| 15 | anticoagulant agent/            | 59377   | Advanced    |
| 16 | anticoagulation*.mp.            | 37652   | Advanced    |
| 17 | anti-coagulation*.mp.           | 713     | Advanced    |
| 18 | warfarin/                       | 47276   | Advanced    |
| 19 | warfarin*.tw.                   | 15331   | Advanced    |
| 20 | coumadin*.tw.                   | 3192    | Advanced    |
| 21 | marevan*.tw.                    | 167     | Advanced    |
| 22 | or/15-21                        | 115855  | Advanced    |
| 23 | exp postoperative complication/ | 389291  | Advanced    |
| 24 | perioperative complication/     | 2225    | Advanced    |
| 25 | peroperative complication/      | 14285   | Advanced    |
| 26 | preoperative complication/      | 163     | Advanced    |
| 27 | surgical risk/                  | 20009   | Advanced    |
| 28 | surgical mortality/             | 23321   | Advanced    |
| 29 | death/                          | 77685   | Advanced    |
| 30 | or/23-29                        | 495713  | Advanced    |
| 31 | exp thrombosis/                 | 170728  | Advanced    |
| 32 | exp thromboembolism/            | 259522  | Advanced    |
| 33 | or/31-32                        | 259522  | Advanced    |
| 34 | 14 and 22 and 30 and 33         | 4965    | Advanced    |

|    |                                                                                                                                                                        |         |          |
|----|------------------------------------------------------------------------------------------------------------------------------------------------------------------------|---------|----------|
| 35 | exp coronary artery bypass graft/                                                                                                                                      | 43196   | Advanced |
| 36 | CABG.mp.                                                                                                                                                               | 14118   | Advanced |
| 37 | exp prophylaxis/                                                                                                                                                       | 553705  | Advanced |
| 38 | thromboprophylaxis.mp.                                                                                                                                                 | 2447    | Advanced |
| 39 | prophylaxis.mp.                                                                                                                                                        | 116023  | Advanced |
| 40 | or/35-39                                                                                                                                                               | 641784  | Advanced |
| 41 | 34 not 40                                                                                                                                                              | 3513    | Advanced |
| 42 | (exp animals/ or exp animal experimentation/) not ((exp animals/ or exp animal experimentation/) and exp human/)                                                       | 2568420 | Advanced |
| 43 | 41 not 42                                                                                                                                                              | 3470    | Advanced |
| 44 | limit 43 to (book or book series or conference abstract or conference paper or "conference review" or editorial or letter or note or proceeding or report or "review") | 1311    | Advanced |
| 45 | 43 not 44                                                                                                                                                              | 2159    | Advanced |
| 46 | limit 45 to yr="2006 -Current"                                                                                                                                         | 862     | Advanced |
| 47 | limit 46 to embase                                                                                                                                                     | 810     | Advanced |

Results of database searches are subject to limitations of the database(s) searched. It is the responsibility of the requestor to determine the accuracy, validity and interpretation of the search results. While the staff of HealthSearch makes every effort to ensure that the information gathered is accurate and up-to- date, HealthSearch disclaims any warranties of any kind, expressed, implied, or statutory regarding the accuracy or completeness of the information or its fitness for a particular purpose. HealthSearch provides information from public sources both in electronic and print formats and does not guarantee its accuracy, completeness or reliability. The information provided is only for the use of the Client and no liability is accepted by HealthSearch to third parties.

Database Searched: Embase 2006 to 2011 Week 31

Date searched: Aug. 10 2011

Search Topic: Antiplatelet and bleeding risks

Embase 1980 to 2011 Week 31

| #  | Searches                                                              | Results | Search Type |
|----|-----------------------------------------------------------------------|---------|-------------|
| 1  | perioperative period/                                                 | 19979   | Advanced    |
| 2  | intraoperative period/                                                | 20153   | Advanced    |
| 3  | postoperative period/                                                 | 99629   | Advanced    |
| 4  | preoperative period/                                                  | 19413   | Advanced    |
| 5  | peroperative care/                                                    | 8154    | Advanced    |
| 6  | postoperative care/                                                   | 56349   | Advanced    |
| 7  | exp surgery/                                                          | 2609983 | Advanced    |
| 8  | procedure?.tw.                                                        | 760135  | Advanced    |
| 9  | (surgical or surger*).tw.                                             | 1185570 | Advanced    |
| 10 | peri-procedur*.tw.                                                    | 625     | Advanced    |
| 11 | periprocedur*.tw.                                                     | 2293    | Advanced    |
| 12 | operative*.tw.                                                        | 189760  | Advanced    |
| 13 | su.fs.                                                                | 1484608 | Advanced    |
| 14 | or/1-13                                                               | 3709343 | Advanced    |
| 15 | exp postoperative complication/                                       | 389914  | Advanced    |
| 16 | perioperative complication/                                           | 2248    | Advanced    |
| 17 | peroperative complication/                                            | 14314   | Advanced    |
| 18 | preoperative complication/                                            | 163     | Advanced    |
| 19 | surgical risk/                                                        | 20056   | Advanced    |
| 20 | surgical mortality/                                                   | 23357   | Advanced    |
| 21 | death/                                                                | 78116   | Advanced    |
| 22 | or/15-21                                                              | 496815  | Advanced    |
| 23 | bleeding/                                                             | 121589  | Advanced    |
| 24 | postoperative hemorrhage/                                             | 13082   | Advanced    |
| 25 | hemostasis/                                                           | 35776   | Advanced    |
| 26 | exp blood transfusion/                                                | 100161  | Advanced    |
| 27 | ((bleeding or hemorrhage or<br>blood loss) adj2<br>complication?).tw. | 9083    | Advanced    |
| 28 | or/23-27                                                              | 249914  | Advanced    |
| 29 | exp antithrombocytic agent/                                           | 210075  | Advanced    |
| 30 | exp nonsteroid antiinflammatory<br>agent/                             | 350592  | Advanced    |
| 31 | antiplatelet*.mp.                                                     | 16323   | Advanced    |
| 32 | anti-platelet*.mp.                                                    | 3405    | Advanced    |
| 33 | NSAID?.mp.                                                            | 20644   | Advanced    |
| 34 | (platelet adj2 antagonist?).mp.                                       | 628     | Advanced    |

|    |                                                                                                                                                                                        |         |          |
|----|----------------------------------------------------------------------------------------------------------------------------------------------------------------------------------------|---------|----------|
| 35 | (platelet adj2 aggregation?).mp.                                                                                                                                                       | 26797   | Advanced |
| 36 | or/29-35                                                                                                                                                                               | 450287  | Advanced |
| 37 | 14 and 22 and 28 and 36                                                                                                                                                                | 3856    | Advanced |
| 38 | exp coronary artery bypass graft/                                                                                                                                                      | 43263   | Advanced |
| 39 | CABG.mp.                                                                                                                                                                               | 14147   | Advanced |
| 40 | or/38-39                                                                                                                                                                               | 47666   | Advanced |
| 41 | 37 not 40                                                                                                                                                                              | 3379    | Advanced |
| 42 | (exp animals/ or exp animal experimentation/) not ((exp animals/ or exp animal experimentation/) and exp human/)                                                                       | 2570435 | Advanced |
| 43 | 41 not 42                                                                                                                                                                              | 3349    | Advanced |
| 44 | limit 43 to (book or book series or conference abstract or conference paper or "conference review" or editorial or letter or note or proceeding or report or "review" or short survey) | 1598    | Advanced |
| 45 | 43 not 44                                                                                                                                                                              | 1751    | Advanced |
| 46 | limit 45 to yr="2006 -Current"                                                                                                                                                         | 971     | Advanced |
| 47 | limit 46 to embase                                                                                                                                                                     | 933     | Advanced |

Results of database searches are subject to limitations of the database(s) searched. It is the responsibility of the requestor to determine the accuracy, validity and interpretation of the search results. While the staff of HealthSearch makes every effort to ensure that the information gathered is accurate and up-to- date, HealthSearch disclaims any warranties of any kind, expressed, implied, or statutory regarding the accuracy or completeness of the information or its fitness for a particular purpose. HealthSearch provides information from public sources both in electronic and print formats and does not guarantee its accuracy, completeness or reliability. The information provided is only for the use of the Client and no liability is accepted by HealthSearch to third parties.

Database Searched: Embase 2006 to 2011 Week 31

Date searched: Aug. 12 2011

Search Topic: Antiplatelet and bleeding risks

Embase 1980 to 2011 Week 31

| #  | Searches                                                              | Results | Search Type |
|----|-----------------------------------------------------------------------|---------|-------------|
| 1  | perioperative period/                                                 | 19979   | Advanced    |
| 2  | intraoperative period/                                                | 20153   | Advanced    |
| 3  | postoperative period/                                                 | 99629   | Advanced    |
| 4  | preoperative period/                                                  | 19413   | Advanced    |
| 5  | peroperative care/                                                    | 8154    | Advanced    |
| 6  | postoperative care/                                                   | 56349   | Advanced    |
| 7  | exp surgery/                                                          | 2609983 | Advanced    |
| 8  | procedure?.tw.                                                        | 760135  | Advanced    |
| 9  | (surgical or surger*).tw.                                             | 1185570 | Advanced    |
| 10 | peri-procedur*.tw.                                                    | 625     | Advanced    |
| 11 | periprocedur*.tw.                                                     | 2293    | Advanced    |
| 12 | operative*.tw.                                                        | 189760  | Advanced    |
| 13 | su.fs.                                                                | 1484608 | Advanced    |
| 14 | or/1-13                                                               | 3709343 | Advanced    |
| 15 | exp postoperative complication/                                       | 389914  | Advanced    |
| 16 | perioperative complication/                                           | 2248    | Advanced    |
| 17 | peroperative complication/                                            | 14314   | Advanced    |
| 18 | preoperative complication/                                            | 163     | Advanced    |
| 19 | surgical risk/                                                        | 20056   | Advanced    |
| 20 | surgical mortality/                                                   | 23357   | Advanced    |
| 21 | death/                                                                | 78116   | Advanced    |
| 22 | or/15-21                                                              | 496815  | Advanced    |
| 23 | bleeding/                                                             | 121589  | Advanced    |
| 24 | postoperative hemorrhage/                                             | 13082   | Advanced    |
| 25 | hemostasis/                                                           | 35776   | Advanced    |
| 26 | exp blood transfusion/                                                | 100161  | Advanced    |
| 27 | ((bleeding or hemorrhage or<br>blood loss) adj2<br>complication?).tw. | 9083    | Advanced    |
| 28 | or/23-27                                                              | 249914  | Advanced    |
| 29 | exp antithrombocytic agent/                                           | 210075  | Advanced    |
| 30 | antiplatelet*.mp.                                                     | 16323   | Advanced    |
| 31 | anti-platelet*.mp.                                                    | 3405    | Advanced    |
| 32 | (platelet adj2 antagonist?).mp.                                       | 628     | Advanced    |
| 33 | (platelet adj2 aggregation?).mp.                                      | 26797   | Advanced    |
| 34 | or/29-33                                                              | 232250  | Advanced    |
| 35 | 14 and 22 and 28 and 34                                               | 2859    | Advanced    |

|    |                                                                                                                                                                                        |         |          |
|----|----------------------------------------------------------------------------------------------------------------------------------------------------------------------------------------|---------|----------|
| 36 | exp coronary artery bypass graft/                                                                                                                                                      | 43263   | Advanced |
| 37 | CABG.mp.                                                                                                                                                                               | 14147   | Advanced |
| 38 | or/36-37                                                                                                                                                                               | 47666   | Advanced |
| 39 | 35 not 38                                                                                                                                                                              | 2393    | Advanced |
| 40 | (exp animals/ or exp animal experimentation/) not ((exp animals/ or exp animal experimentation/) and exp human/)                                                                       | 2570435 | Advanced |
| 41 | 39 not 40                                                                                                                                                                              | 2371    | Advanced |
| 42 | limit 41 to (book or book series or conference abstract or conference paper or "conference review" or editorial or letter or note or proceeding or report or "review" or short survey) | 1198    | Advanced |
| 43 | 41 not 42                                                                                                                                                                              | 1173    | Advanced |
| 44 | limit 43 to yr="2006 -Current"                                                                                                                                                         | 653     | Advanced |
| 45 | limit 44 to embase                                                                                                                                                                     | 619     | Advanced |

Results of database searches are subject to limitations of the database(s) searched. It is the responsibility of the requestor to determine the accuracy, validity and interpretation of the search results. While the staff of HealthSearch makes every effort to ensure that the information gathered is accurate and up-to- date, HealthSearch disclaims any warranties of any kind, expressed, implied, or statutory regarding the accuracy or completeness of the information or its fitness for a particular purpose. HealthSearch provides information from public sources both in electronic and print formats and does not guarantee its accuracy, completeness or reliability. The information provided is only for the use of the Client and no liability is accepted by HealthSearch to third parties.

Database Searched: Embase 2006 to 2011 Week 32

Date searched: Aug. 16, 2011

Search Topic: Antiplatelet and thrombosis risks

Embase 1980 to 2011 Week 32

| #  | Searches                          | Results | Search Type |
|----|-----------------------------------|---------|-------------|
| 1  | perioperative period/             | 20021   | Advanced    |
| 2  | intraoperative period/            | 20188   | Advanced    |
| 3  | postoperative period/             | 99809   | Advanced    |
| 4  | preoperative period/              | 19461   | Advanced    |
| 5  | peroperative care/                | 8170    | Advanced    |
| 6  | postoperative care/               | 56426   | Advanced    |
| 7  | exp surgery/                      | 2613950 | Advanced    |
| 8  | procedure?.tw.                    | 761443  | Advanced    |
| 9  | (surgical or surger*).tw.         | 1187611 | Advanced    |
| 10 | peri-procedur*.tw.                | 627     | Advanced    |
| 11 | periprocedur*.tw.                 | 2304    | Advanced    |
| 12 | operative*.tw.                    | 190107  | Advanced    |
| 13 | su.fs.                            | 1486769 | Advanced    |
| 14 | or/1-13                           | 3714734 | Advanced    |
| 15 | exp postoperative complication/   | 390472  | Advanced    |
| 16 | perioperative complication/       | 2265    | Advanced    |
| 17 | peroperative complication/        | 14345   | Advanced    |
| 18 | preoperative complication/        | 163     | Advanced    |
| 19 | surgical risk/                    | 20100   | Advanced    |
| 20 | surgical mortality/               | 23395   | Advanced    |
| 21 | death/                            | 78339   | Advanced    |
| 22 | or/15-21                          | 497662  | Advanced    |
| 23 | exp thrombosis/                   | 171301  | Advanced    |
| 24 | exp thromboembolism/              | 260377  | Advanced    |
| 25 | or/23-24                          | 260377  | Advanced    |
| 26 | exp antithrombocytic agent/       | 210326  | Advanced    |
| 27 | antiplatelet*.mp.                 | 16354   | Advanced    |
| 28 | anti-platelet*.mp.                | 3420    | Advanced    |
| 29 | (platelet adj2 antagonist?).mp.   | 628     | Advanced    |
| 30 | (platelet adj2 aggregation?).mp.  | 26827   | Advanced    |
| 31 | or/26-30                          | 232534  | Advanced    |
| 32 | 14 and 22 and 25 and 31           | 3699    | Advanced    |
| 33 | exp coronary artery bypass graft/ | 43318   | Advanced    |
| 34 | CABG.mp.                          | 14162   | Advanced    |



|    |                                                                                                                                                                                        |         |          |
|----|----------------------------------------------------------------------------------------------------------------------------------------------------------------------------------------|---------|----------|
| 35 | exp prophylaxis/                                                                                                                                                                       | 555763  | Advanced |
| 36 | prophylaxis.mp.                                                                                                                                                                        | 116333  | Advanced |
| 37 | thromboprophylaxis.mp.                                                                                                                                                                 | 2456    | Advanced |
| 38 | or/33-37                                                                                                                                                                               | 644066  | Advanced |
| 39 | 32 not 38                                                                                                                                                                              | 2590    | Advanced |
| 40 | (exp animals/ or exp animal experimentation/) not ((exp animals/ or exp animal experimentation/) and exp human/)                                                                       | 2573370 | Advanced |
| 41 | 39 not 40                                                                                                                                                                              | 2549    | Advanced |
| 42 | limit 41 to (book or book series or conference abstract or conference paper or "conference review" or editorial or letter or note or proceeding or report or "review" or short survey) | 1175    | Advanced |
| 43 | 41 not 42                                                                                                                                                                              | 1374    | Advanced |
| 44 | limit 43 to yr="2006 -Current"                                                                                                                                                         | 791     | Advanced |
| 45 | limit 44 to embase                                                                                                                                                                     | 770     | Advanced |

Results of database searches are subject to limitations of the database(s) searched. It is the responsibility of the requestor to determine the accuracy, validity and interpretation of the search results. While the staff of HealthSearch makes every effort to ensure that the information gathered is accurate and up-to- date, HealthSearch disclaims any warranties of any kind, expressed, implied, or statutory regarding the accuracy or completeness of the information or its fitness for a particular purpose. HealthSearch provides information from public sources both in electronic and print formats and does not guarantee its accuracy, completeness or reliability. The information provided is only for the use of the Client and no liability is accepted by HealthSearch to third parties.

Database Searched: Ovid MEDLINE(R) 2006 to July Week 3 2011

Date searched: July 29, 2011

Search Topic: Anticoagulants and thrombosis risks

Ovid MEDLINE(R) 1948 to July Week 3 2011

| #  | Searches                               | Results | Search Type |
|----|----------------------------------------|---------|-------------|
| 1  | exp Surgical Procedures,<br>Operative/ | 2063168 | Advanced    |
| 2  | perioperative Period/                  | 173     | Advanced    |
| 3  | intraoperative Period/                 | 11044   | Advanced    |
| 4  | exp postoperative period/              | 32570   | Advanced    |
| 5  | preoperative period/                   | 564     | Advanced    |
| 6  | Perioperative Care/                    | 6396    | Advanced    |
| 7  | Intraoperative Care/                   | 12410   | Advanced    |
| 8  | Postoperative Care/                    | 48148   | Advanced    |
| 9  | operative*.tw.                         | 154134  | Advanced    |
| 10 | (surgical or surger*).tw.              | 993009  | Advanced    |
| 11 | procedure?.tw.                         | 637741  | Advanced    |
| 12 | peri-procedur*.tw.                     | 259     | Advanced    |
| 13 | periprocedur*.tw.                      | 1540    | Advanced    |
| 14 | su.fs.                                 | 1404347 | Advanced    |
| 15 | or/1-14                                | 3209547 | Advanced    |
| 16 | Anticoagulants/                        | 45412   | Advanced    |
| 17 | anticoagulation*.mp.                   | 18426   | Advanced    |
| 18 | anti-coagulation*.mp.                  | 418     | Advanced    |
| 19 | Warfarin/                              | 12231   | Advanced    |
| 20 | warfarin*.tw.                          | 12115   | Advanced    |
| 21 | coumadin*.tw.                          | 791     | Advanced    |
| 22 | marevan*.tw.                           | 10      | Advanced    |
| 23 | or/16-22                               | 62292   | Advanced    |
| 24 | exp Postoperative<br>Complications/    | 369155  | Advanced    |
| 25 | exp Intraoperative<br>Complications/   | 31725   | Advanced    |
| 26 | exp risk/                              | 674969  | Advanced    |
| 27 | Mortality/                             | 31031   | Advanced    |
| 28 | Death/                                 | 10761   | Advanced    |
| 29 | or/24-28                               | 1066889 | Advanced    |
| 30 | Embolism/                              | 9689    | Advanced    |
| 31 | exp Pulmonary Embolism/                | 28126   | Advanced    |
| 32 | exp Thrombosis/                        | 125415  | Advanced    |
| 33 | exp Thromboembolism/                   | 37944   | Advanced    |
| 34 | or/30-33                               | 151291  | Advanced    |

|    |                                                                                                                            |         |          |
|----|----------------------------------------------------------------------------------------------------------------------------|---------|----------|
| 35 | 15 and 23 and 29 and 34                                                                                                    | 4158    | Advanced |
| 36 | exp Coronary Artery Bypass/                                                                                                | 40403   | Advanced |
| 37 | CABG.mp.                                                                                                                   | 9969    | Advanced |
| 38 | prophylaxis.mp.                                                                                                            | 64479   | Advanced |
| 39 | thromboprophylaxis.mp.                                                                                                     | 1774    | Advanced |
| 40 | or/36-39                                                                                                                   | 107337  | Advanced |
| 41 | 35 not 40                                                                                                                  | 2866    | Advanced |
| 42 | exp animals/ not (exp animals/<br>and exp humans/)                                                                         | 3618713 | Advanced |
| 43 | 41 not 42                                                                                                                  | 2819    | Advanced |
| 44 | limit 43 to (case reports or<br>comment or editorial or lectures or<br>letter or news or newspaper article or<br>"review") | 1165    | Advanced |
| 45 | 43 not 44                                                                                                                  | 1654    | Advanced |
| 46 | limit 45 to yr="2006 -Current"                                                                                             | 416     | Advanced |

Results of database searches are subject to limitations of the database(s) searched. It is the responsibility of the requestor to determine the accuracy, validity and interpretation of the search results. While the staff of HealthSearch makes every effort to ensure that the information gathered is accurate and up-to- date, HealthSearch disclaims any warranties of any kind, expressed, implied, or statutory regarding the accuracy or completeness of the information or its fitness for a particular purpose. HealthSearch provides information from public sources both in electronic and print formats and does not guarantee its accuracy, completeness or reliability. The information provided is only for the use of the Client and no liability is accepted by HealthSearch to third parties.

Database Searched: Ovid MEDLINE(R) 2006 to July Week 4 2011

Date searched: Aug. 10, 2011

Search Topic: Antiplatelet and bleeding risks

Ovid MEDLINE(R) 1948 to July Week 4 2011

| #  | Searches                                                              | Results | Search Type |
|----|-----------------------------------------------------------------------|---------|-------------|
| 1  | exp Surgical Procedures,<br>Operative/                                | 2082785 | Advanced    |
| 2  | perioperative Period/                                                 | 187     | Advanced    |
| 3  | intraoperative Period/                                                | 11174   | Advanced    |
| 4  | exp postoperative period/                                             | 33226   | Advanced    |
| 5  | preoperative period/                                                  | 583     | Advanced    |
| 6  | Perioperative Care/                                                   | 6505    | Advanced    |
| 7  | Intraoperative Care/                                                  | 12512   | Advanced    |
| 8  | Postoperative Care/                                                   | 48588   | Advanced    |
| 9  | operative*.tw.                                                        | 156106  | Advanced    |
| 10 | (surgical or surger*).tw.                                             | 1003232 | Advanced    |
| 11 | procedure?.tw.                                                        | 641809  | Advanced    |
| 12 | peri-procedur*.tw.                                                    | 259     | Advanced    |
| 13 | periprocedur*.tw.                                                     | 1549    | Advanced    |
| 14 | su.fs.                                                                | 1419241 | Advanced    |
| 15 | or/1-14                                                               | 3238969 | Advanced    |
| 16 | exp Postoperative<br>Complications/                                   | 371970  | Advanced    |
| 17 | exp Intraoperative<br>Complications/                                  | 31939   | Advanced    |
| 18 | exp risk/                                                             | 680266  | Advanced    |
| 19 | Mortality/                                                            | 31196   | Advanced    |
| 20 | Death/                                                                | 10803   | Advanced    |
| 21 | or/16-20                                                              | 1075149 | Advanced    |
| 22 | exp Postoperative Hemorrhage/                                         | 4620    | Advanced    |
| 23 | Hemorrhage/                                                           | 46315   | Advanced    |
| 24 | Blood Loss, Surgical/                                                 | 9133    | Advanced    |
| 25 | exp Hemostasis, Surgical/                                             | 4992    | Advanced    |
| 26 | exp Blood Transfusion/                                                | 74414   | Advanced    |
| 27 | ((hemorrhage or bleeding or<br>blood loss) adj2<br>complication?).tw. | 6818    | Advanced    |
| 28 | or/22-27                                                              | 135913  | Advanced    |
| 29 | exp Platelet Aggregation<br>Inhibitors/                               | 82881   | Advanced    |
| 30 | exp Anti-Inflammatory Agents,<br>Non-Steroidal/                       | 139642  | Advanced    |
| 31 | antiplatelet*.mp.                                                     | 11759   | Advanced    |

|    |                                                                                                                |         |          |
|----|----------------------------------------------------------------------------------------------------------------|---------|----------|
| 32 | NSAID?.mp.                                                                                                     | 14516   | Advanced |
| 33 | (platelet adj2 antagonist?).mp.                                                                                | 521     | Advanced |
| 34 | (platelet adj2 aggregation?).mp.                                                                               | 52409   | Advanced |
| 35 | or/29-34                                                                                                       | 216797  | Advanced |
| 36 | 15 and 21 and 28 and 35                                                                                        | 1378    | Advanced |
| 37 | exp Coronary Artery Bypass/                                                                                    | 41215   | Advanced |
| 38 | CABG.mp.                                                                                                       | 10228   | Advanced |
| 39 | or/37-38                                                                                                       | 42910   | Advanced |
| 40 | 36 not 39                                                                                                      | 1124    | Advanced |
| 41 | exp animals/ not (exp animals/<br>and exp humans/)                                                             | 3647729 | Advanced |
| 42 | 40 not 41                                                                                                      | 1105    | Advanced |
| 43 | limit 42 to (case reports or<br>comment or editorial or letter or<br>news or newspaper article or<br>"review") | 395     | Advanced |
| 44 | 42 not 43                                                                                                      | 710     | Advanced |
| 45 | limit 44 to yr="2006 -Current"                                                                                 | 307     | Advanced |

Results of database searches are subject to limitations of the database(s) searched. It is the responsibility of the requestor to determine the accuracy, validity and interpretation of the search results. While the staff of HealthSearch makes every effort to ensure that the information gathered is accurate and up-to- date, HealthSearch disclaims any warranties of any kind, expressed, implied, or statutory regarding the accuracy or completeness of the information or its fitness for a particular purpose. HealthSearch provides information from public sources both in electronic and print formats and does not guarantee its accuracy, completeness or reliability. The information provided is only for the use of the Client and no liability is accepted by HealthSearch to third parties.

Database Searched: Ovid MEDLINE(R) 2006 to August Week 1 2011

Date searched: Aug. 12, 2011

Search Topic: Antiplatelet and bleeding risks

Ovid MEDLINE(R) 1948 to August Week 1 2011

| #  | Searches                                                              | Results | Search Type |
|----|-----------------------------------------------------------------------|---------|-------------|
| 1  | exp Surgical Procedures,<br>Operative/                                | 2084339 | Advanced    |
| 2  | perioperative Period/                                                 | 195     | Advanced    |
| 3  | intraoperative Period/                                                | 11179   | Advanced    |
| 4  | exp postoperative period/                                             | 33259   | Advanced    |
| 5  | preoperative period/                                                  | 592     | Advanced    |
| 6  | Perioperative Care/                                                   | 6522    | Advanced    |
| 7  | Intraoperative Care/                                                  | 12521   | Advanced    |
| 8  | Postoperative Care/                                                   | 48626   | Advanced    |
| 9  | operative*.tw.                                                        | 156282  | Advanced    |
| 10 | (surgical or surger*).tw.                                             | 1004230 | Advanced    |
| 11 | procedure?.tw.                                                        | 642456  | Advanced    |
| 12 | peri-procedur*.tw.                                                    | 261     | Advanced    |
| 13 | periprocedur*.tw.                                                     | 1551    | Advanced    |
| 14 | su.fs.                                                                | 1420293 | Advanced    |
| 15 | or/1-14                                                               | 3241411 | Advanced    |
| 16 | exp Postoperative<br>Complications/                                   | 372263  | Advanced    |
| 17 | exp Intraoperative<br>Complications/                                  | 31972   | Advanced    |
| 18 | exp risk/                                                             | 681189  | Advanced    |
| 19 | Mortality/                                                            | 31228   | Advanced    |
| 20 | Death/                                                                | 10809   | Advanced    |
| 21 | or/16-20                                                              | 1076366 | Advanced    |
| 22 | exp Postoperative<br>Hemorrhage/                                      | 4627    | Advanced    |
| 23 | Hemorrhage/                                                           | 46339   | Advanced    |
| 24 | Blood Loss, Surgical/                                                 | 9146    | Advanced    |
| 25 | exp Hemostasis, Surgical/                                             | 4995    | Advanced    |
| 26 | exp Blood Transfusion/                                                | 74442   | Advanced    |
| 27 | ((hemorrhage or bleeding or<br>blood loss) adj2<br>complication?).tw. | 6821    | Advanced    |
| 28 | or/22-27                                                              | 135983  | Advanced    |
| 29 | exp Platelet Aggregation<br>Inhibitors/                               | 82921   | Advanced    |
| 30 | anti-platelet*.mp.                                                    | 2372    | Advanced    |
| 31 | antiplatelet*.mp.                                                     | 11774   | Advanced    |

|    |                                                                                                       |         |          |
|----|-------------------------------------------------------------------------------------------------------|---------|----------|
| 32 | (platelet adj2 antagonist?).mp.                                                                       | 521     | Advanced |
| 33 | (platelet adj2 aggregation?).mp.                                                                      | 52442   | Advanced |
| 34 | or/29-33                                                                                              | 113436  | Advanced |
| 35 | 15 and 21 and 28 and 34                                                                               | 1241    | Advanced |
| 36 | exp Coronary Artery Bypass/                                                                           | 41233   | Advanced |
| 37 | CABG.mp.                                                                                              | 10233   | Advanced |
| 38 | or/36-37                                                                                              | 42929   | Advanced |
| 39 | 35 not 38                                                                                             | 989     | Advanced |
| 40 | exp animals/ not (exp animals/ and exp humans/)                                                       | 3650161 | Advanced |
| 41 | 39 not 40                                                                                             | 972     | Advanced |
| 42 | limit 41 to (case reports or comment or editorial or letter or news or newspaper article or "review") | 370     | Advanced |
| 43 | 41 not 42                                                                                             | 602     | Advanced |
| 44 | limit 43 to yr="2006 -Current"                                                                        | 279     | Advanced |

Results of database searches are subject to limitations of the database(s) searched. It is the responsibility of the requestor to determine the accuracy, validity and interpretation of the search results. While the staff of HealthSearch makes every effort to ensure that the information gathered is accurate and up-to-date, HealthSearch disclaims any warranties of any kind, expressed, implied, or statutory regarding the accuracy or completeness of the information or its fitness for a particular purpose. HealthSearch provides information from public sources both in electronic and print formats and does not guarantee its accuracy, completeness or reliability. The information provided is only for the use of the Client and no liability is accepted by HealthSearch to third parties.

Database Searched: Ovid MEDLINE(R) 2006 to July Week 4 2011

Date searched: Aug. 08, 2011

Search Topic: Antiplatelet and bleeding risks

Ovid MEDLINE(R) 1948 to July Week 4 2011

| #  | Searches                                                              | Results | Search Type |
|----|-----------------------------------------------------------------------|---------|-------------|
| 1  | exp Surgical Procedures,<br>Operative/                                | 2082785 | Advanced    |
| 2  | perioperative Period/                                                 | 187     | Advanced    |
| 3  | intraoperative Period/                                                | 11174   | Advanced    |
| 4  | exp postoperative period/                                             | 33226   | Advanced    |
| 5  | preoperative period/                                                  | 583     | Advanced    |
| 6  | Perioperative Care/                                                   | 6505    | Advanced    |
| 7  | Intraoperative Care/                                                  | 12512   | Advanced    |
| 8  | Postoperative Care/                                                   | 48588   | Advanced    |
| 9  | operative*.tw.                                                        | 156106  | Advanced    |
| 10 | (surgical or surger*).tw.                                             | 1003232 | Advanced    |
| 11 | procedure?.tw.                                                        | 641809  | Advanced    |
| 12 | peri-procedur*.tw.                                                    | 259     | Advanced    |
| 13 | periprocedur*.tw.                                                     | 1549    | Advanced    |
| 14 | su.fs.                                                                | 1419241 | Advanced    |
| 15 | or/1-14                                                               | 3238969 | Advanced    |
| 16 | exp Postoperative<br>Complications/                                   | 371970  | Advanced    |
| 17 | exp Intraoperative<br>Complications/                                  | 31939   | Advanced    |
| 18 | exp risk/                                                             | 680266  | Advanced    |
| 19 | Mortality/                                                            | 31196   | Advanced    |
| 20 | Death/                                                                | 10803   | Advanced    |
| 21 | or/16-20                                                              | 1075149 | Advanced    |
| 22 | exp Postoperative<br>Hemorrhage/                                      | 4620    | Advanced    |
| 23 | Hemorrhage/                                                           | 46315   | Advanced    |
| 24 | Blood Loss, Surgical/                                                 | 9133    | Advanced    |
| 25 | exp Hemostasis, Surgical/                                             | 4992    | Advanced    |
| 26 | exp Blood Transfusion/                                                | 74414   | Advanced    |
| 27 | ((hemorrhage or bleeding or<br>blood loss) adj2<br>complication?).tw. | 6818    | Advanced    |
| 28 | or/22-27                                                              | 135913  | Advanced    |
| 29 | exp Platelet Aggregation<br>Inhibitors/                               | 82881   | Advanced    |
| 30 | exp Anti-Inflammatory Agents,<br>Non-Steroidal/                       | 139642  | Advanced    |



|    |                                                                                                                |         |          |
|----|----------------------------------------------------------------------------------------------------------------|---------|----------|
| 31 | antiplatelet*.mp.                                                                                              | 11759   | Advanced |
| 32 | NSAID?.mp.                                                                                                     | 14516   | Advanced |
| 33 | (platelet adj2<br>antagonist?).mp.                                                                             | 521     | Advanced |
| 34 | (platelet adj2<br>aggregation?).mp.                                                                            | 52409   | Advanced |
| 35 | or/29-34                                                                                                       | 216797  | Advanced |
| 36 | 21 and 28 and 35                                                                                               | 1895    | Advanced |
| 37 | exp Coronary Artery Bypass/                                                                                    | 41215   | Advanced |
| 38 | CABG.mp.                                                                                                       | 10228   | Advanced |
| 39 | or/37-38                                                                                                       | 42910   | Advanced |
| 40 | 36 not 39                                                                                                      | 1641    | Advanced |
| 41 | exp animals/ not (exp<br>animals/ and exp humans/)                                                             | 3647729 | Advanced |
| 42 | 40 not 41                                                                                                      | 1610    | Advanced |
| 43 | limit 42 to (case reports or<br>comment or editorial or letter or<br>news or newspaper article or<br>"review") | 638     | Advanced |
| 44 | 42 not 43                                                                                                      | 972     | Advanced |
| 45 | limit 44 to yr="2006 -Current"                                                                                 | 432     | Advanced |

Results of database searches are subject to limitations of the database(s) searched. It is the responsibility of the requestor to determine the accuracy, validity and interpretation of the search results. While the staff of HealthSearch makes every effort to ensure that the information gathered is accurate and up-to- date, HealthSearch disclaims any warranties of any kind, expressed, implied, or statutory regarding the accuracy or completeness of the information or its fitness for a particular purpose. HealthSearch provides information from public sources both in electronic and print formats and does not guarantee its accuracy, completeness or reliability. The information provided is only for the use of the Client and no liability is accepted by HealthSearch to third parties.

Database Searched: Ovid MEDLINE(R) 2006 to August Week 1 2011

Date searched: Aug. 16, 2011

Search Topic: Antiplatelet and thrombosis risks

**Ovid MEDLINE(R) 1948 to August Week 1 2011**

| #  | Searches                                | Results | Search Type |
|----|-----------------------------------------|---------|-------------|
| 1  | exp Surgical Procedures,<br>Operative/  | 2084339 | Advanced    |
| 2  | perioperative Period/                   | 195     | Advanced    |
| 3  | intraoperative Period/                  | 11179   | Advanced    |
| 4  | exp postoperative period/               | 33259   | Advanced    |
| 5  | preoperative period/                    | 592     | Advanced    |
| 6  | Perioperative Care/                     | 6522    | Advanced    |
| 7  | Intraoperative Care/                    | 12521   | Advanced    |
| 8  | Postoperative Care/                     | 48626   | Advanced    |
| 9  | operative*.tw.                          | 156282  | Advanced    |
| 10 | (surgical or surger*).tw.               | 1004230 | Advanced    |
| 11 | procedure?.tw.                          | 642456  | Advanced    |
| 12 | peri-procedur*.tw.                      | 261     | Advanced    |
| 13 | periprocedur*.tw.                       | 1551    | Advanced    |
| 14 | su.fs.                                  | 1420293 | Advanced    |
| 15 | or/1-14                                 | 3241411 | Advanced    |
| 16 | exp Postoperative<br>Complications/     | 372263  | Advanced    |
| 17 | exp Intraoperative<br>Complications/    | 31972   | Advanced    |
| 18 | exp risk/                               | 681189  | Advanced    |
| 19 | Mortality/                              | 31228   | Advanced    |
| 20 | Death/                                  | 10809   | Advanced    |
| 21 | or/16-20                                | 1076366 | Advanced    |
| 22 | Embolism/                               | 9746    | Advanced    |
| 23 | exp Pulmonary Embolism/                 | 28401   | Advanced    |
| 24 | exp Thrombosis/                         | 126631  | Advanced    |
| 25 | exp Thromboembolism/                    | 38266   | Advanced    |
| 26 | or/22-25                                | 152768  | Advanced    |
| 27 | exp Platelet Aggregation<br>Inhibitors/ | 82921   | Advanced    |
| 28 | anti-platelet*.mp.                      | 2372    | Advanced    |
| 29 | antiplatelet*.mp.                       | 11774   | Advanced    |
| 30 | (platelet adj2<br>antagonist?).mp.      | 521     | Advanced    |
| 31 | (platelet adj2<br>aggregation?).mp.     | 52442   | Advanced    |
| 32 | or/27-31                                | 113436  | Advanced    |

|    |                                                                                                       |         |          |
|----|-------------------------------------------------------------------------------------------------------|---------|----------|
| 33 | 15 and 21 and 26 and 32                                                                               | 1490    | Advanced |
| 34 | exp Coronary Artery Bypass/                                                                           | 41233   | Advanced |
| 35 | CABG.mp.                                                                                              | 10233   | Advanced |
| 36 | prophylaxis.mp.                                                                                       | 64881   | Advanced |
| 37 | thromboprophylaxis.mp.                                                                                | 1790    | Advanced |
| 38 | or/34-37                                                                                              | 108616  | Advanced |
| 39 | 33 not 38                                                                                             | 1212    | Advanced |
| 40 | exp animals/ not (exp animals/ and exp humans/)                                                       | 3650161 | Advanced |
| 41 | 39 not 40                                                                                             | 1147    | Advanced |
| 42 | limit 41 to (case reports or comment or editorial or letter or news or newspaper article or "review") | 495     | Advanced |
| 43 | 41 not 42                                                                                             | 652     | Advanced |
| 44 | limit 43 to yr="2006 -Current"                                                                        | 264     | Advanced |

Results of database searches are subject to limitations of the database(s) searched. It is the responsibility of the requestor to determine the accuracy, validity and interpretation of the search results. While the staff of HealthSearch makes every effort to ensure that the information gathered is accurate and up-to- date, HealthSearch disclaims any warranties of any kind, expressed, implied, or statutory regarding the accuracy or completeness of the information or its fitness for a particular purpose. HealthSearch provides information from public sources both in electronic and print formats and does not guarantee its accuracy, completeness or reliability. The information provided is only for the use of the Client and no liability is accepted by HealthSearch to third parties.

## **Appendix e-5: Classification of Evidence for Prognostic Studies**

**Class I:** A cohort study of a broad spectrum of persons at risk for developing the outcome (e.g., target disease, work status). The outcome is defined by an acceptable reference standard for case definition. The outcome is objective or measured by an observer who is masked to the presence of the risk factor. Study results allow calculation of measures of prognostic accuracy.

**Class II:** A case control study of a broad spectrum of persons with the condition compared to a broad spectrum of controls or a cohort study of a broad spectrum of persons at risk for the outcome (e.g., target disease, work status) where the data was collected retrospectively. The outcome is defined by an acceptable reference standard for case definition. The outcome is objective or measured by an observer who is masked to the presence of the risk factor. Study results allow calculation of measures of prognostic accuracy.

**Class III:** A case control study or a cohort study where either the persons with the condition or the controls are of a narrow spectrum where the data was collected retrospectively. The outcome is defined by an acceptable reference standard for case definition. The outcome is objective or measured by an observer who did not determine the presence of the risk factor. Study results allow calculation of measures of a prognostic accuracy.

**Class IV:** Studies not meeting Class I, II, or III criteria, including consensus, expert opinion, or a case report.

## **Appendix e-6: Classification of Recommendations**

A = Established as effective, ineffective or harmful (or established as useful/predictive or not useful/predictive) for the given condition in the specified population. (Level A rating requires at least two consistent Class I studies.)\*

B = Probably effective, ineffective or harmful (or probably useful/predictive or not useful/predictive) for the given condition in the specified population. (Level B rating requires at least one Class I study or two consistent Class II studies.)

C = Possibly effective, ineffective or harmful (or possibly useful/predictive or not useful/predictive) for the given condition in the specified population. (Level C rating requires at least one Class II study or two consistent Class III studies.)

U = Data inadequate or conflicting; given current knowledge, treatment (test, predictor) is unproven.

\*In exceptional cases, one convincing Class I study may suffice for an "A" recommendation if 1) all criteria are met, 2) the magnitude of effect is large (relative rate improved outcome > 5 and the lower limit of the confidence interval is > 2).
